## CORRECTION

# Correction: The role of social capital in shaping livelihood for rural Vietnamese households

Huynh Ngoc Chuong

There are errors in the Funding statement. The correct Funding statement is as follows: The funding for this research was provided by the University of Economics and Law (UEL), Vietnam National University Ho Chi Minh City (VNU-HCM). The funder had no role in study design, data collection and analysis, decision to publish, or preparation of the manuscript.

## Reference

1. Chuong HN (2023) The role of social capital in shaping livelihood for rural Vietnamese households. PLoS ONE 18(12): e0295292. <https://doi.org/10.1371/journal.pone.0295292>. PMID: 38096178

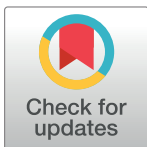

## OPEN ACCESS

**Citation:** Chuong HN (2024) Correction: The role of social capital in shaping livelihood for rural Vietnamese households. PLoS ONE 19(2): e0299867. <https://doi.org/10.1371/journal.pone.0299867>

**Published:** February 27, 2024

**Copyright:** © 2024 Huynh Ngoc Chuong. This is an open access article distributed under the terms of the [Creative Commons Attribution License](https://creativecommons.org/licenses/by/4.0/), which permits unrestricted use, distribution, and reproduction in any medium, provided the original author and source are credited.
